# Supplementary material for: miR-21 increases c-kit+ cardiac stem cell proliferation in vitro through PTEN/PI3K/Akt signaling
Source: PeerJ. 2017 Jan 5;5:e2859. doi: 10.7717/peerj.2859 (PMC5289448; doi:10.7717/peerj.2859)
Supplement: Data S1 [file peerj-05-2859-s001.xlsx]

## Sheet: Sheet1
Figure 1B
control	24h	48h	72h
13.4903	76.1368	87.4583	92.2316
10.2949	93.088	86.4537	67.6737
9.29973	78.8218	95.705	75.2623
Figure 1C
Control	miR-21 scramle	miR-21 mimics
13.3972	9.27827	87.8633
10.5112	10.083	84.8704
10.3426	10.1297	95.9264
Figure 2A
	24h	48h	72h
Control	0.4837	0.6225	0.4799
	0.4843	0.6234	0.482
	0.4882	0.6271	0.486
Scramble	0.4998	0.6095	0.5282
	0.5002	0.6593	0.4655
	0.5057	0.6382	0.4825
Mimics	0.6825	0.8894	0.7063
	0.6578	0.859	0.7001
	0.6979	0.888	0.7005
Figure 2C
Control	miR-21 scramle	miR-21 mimics
38.2979	34	69.3333
40	38.7755	68.75
32.6531	38.8889	69.7368
35.8491	38.4615	68.4931
34.7826	36	73.4177
41.1765	32.6087	64.9351
Figure 2D
Control	miR-21 scramle	miR-21 mimics
0.437264	0.431967	0.876655
0.42607	0.423703	0.913739
0.425822	0.423103	0.877467
Figure 3A
Control	miR-21 scramle	miR-21 mimics
72.6986	76.6664	74.9154
76.8438	73.7135	76.6664
75.4364	76.313	75.4364
Figure 3B
Control	miR-21 scramle	miR-21 mimics
0.752695	0.705287	0.324446
0.761651	0.816307	0.266923
0.72106	0.8069	0.247421
Figure 4B
Control	miR-21 scramle	miR-21 mimics	Phen	Mimics+LY294002
38.2979	34	69.3333	68.8889	34.6154
40	38.7755	68.75	74.359	28.7671
32.6531	38.8889	69.7368	70.3704	32.7586
35.8491	38.4615	68.4931	69.6202	38.983
34.7826	36	73.4177	66.25	36.1111
41.1765	32.6087	64.9351	64.6342	30.137
Figure 4C
	G0/G1	S	G2/M
Control	73.34	13.32	13.34
	72.11	13.44	14.45
	75.26	12.14	12.6
miR-21 scramle	80.26	12.4	7.34
	77.67	11.46	10.87
	78.87	12.11	9.02
miR-21 mimics	63.05	31.64	5.31
	64.44	32.72	2.84
	63.21	31.67	5.12
Phen	56.88	21.3	21.82
	59.98	22.81	17.21
	53.18	21.66	25.16
Mimics+LY294002	76.85	12.19	10.96
	69.42	15.91	14.67
	75.41	12.15	12.44
Figure 4D
Control	miR-21 scramle	miR-21 mimics	Phen	Mimics+LY294002
0.75406	0.748308	0.738089	0.734398	0.738594
0.740641	0.720678	0.736194	0.77664	0.760331
0.72901	0.719078	0.719436	0.740069	0.722985
Figure 5A
Control	miR-21 scramle	miR-21 mimics	Phen	Mimics+LY294002
72.6986	76.6664	74.9154	23.4881	68.302
76.8438	73.7135	76.6664	25.2905	63.8754
75.4364	76.313	75.4364	19.2554	70.0602
Figure 5C
	PTEN	p-AKT	Total-AKT
Control	0.752695	0.253853	0.75406
	0.761651	0.288735	0.740641
	0.72106	0.266442	0.72901
miR-21 scramle	0.705287	0.251512	0.748308
	0.816307	0.256298	0.720678
	0.8069	0.267561	0.719078
miR-21 mimics	0.324446	0.860478	0.738089
	0.266923	0.833954	0.736194
	0.247421	0.819022	0.719436
Phen	0.240716	0.867683	0.734398
	0.242494	0.901409	0.77664
	0.231186	0.862905	0.740069
Mimics+LY294002	0.237479	0.253076	0.738594
	0.245388	0.26453	0.760331
	0.230513	0.245899	0.722985
